# Supplementary material for: Behavior of Muscle-Derived Stem Cells on Silica Nanostructured Substrates
Source: PubMed Central journal article supplement (PMC7558836; doi:10.3390/nano10091651), 2020-08-22
Supplement: nanomaterials-10-01651-s001.pdf [file nanomaterials-10-01651-s001.pdf]

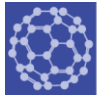

Supporting Information

# Behavior of Muscle-derived Stem Cells on Silica Nanostructured Substrates

Hyo-Sop Kim, Bit Na Lee, Sangdun Choi, Moon Suk Kim\*, Jae-Ho Kim\*

Department of Molecular Science and Technology, Ajou University, Suwon 16499, Korea, ikari06@ajou.ac.kr (H.S.K.); newri21@naver.com (B.N.L.); sangdunchoi@ajou.ac.kr (S.C.)

\* Correspondence: moonskim@ajou.ac.kr; Tel.: +82-(31)-219-2608; Fax: +82-(31)-219-3931; jhkim@ajou.ac.kr; Tel.: +82-(31)-219-2517; Fax: +82-(31)-219-2516

Hyo-Sop Kim and Bit Na Lee are equal first authors.

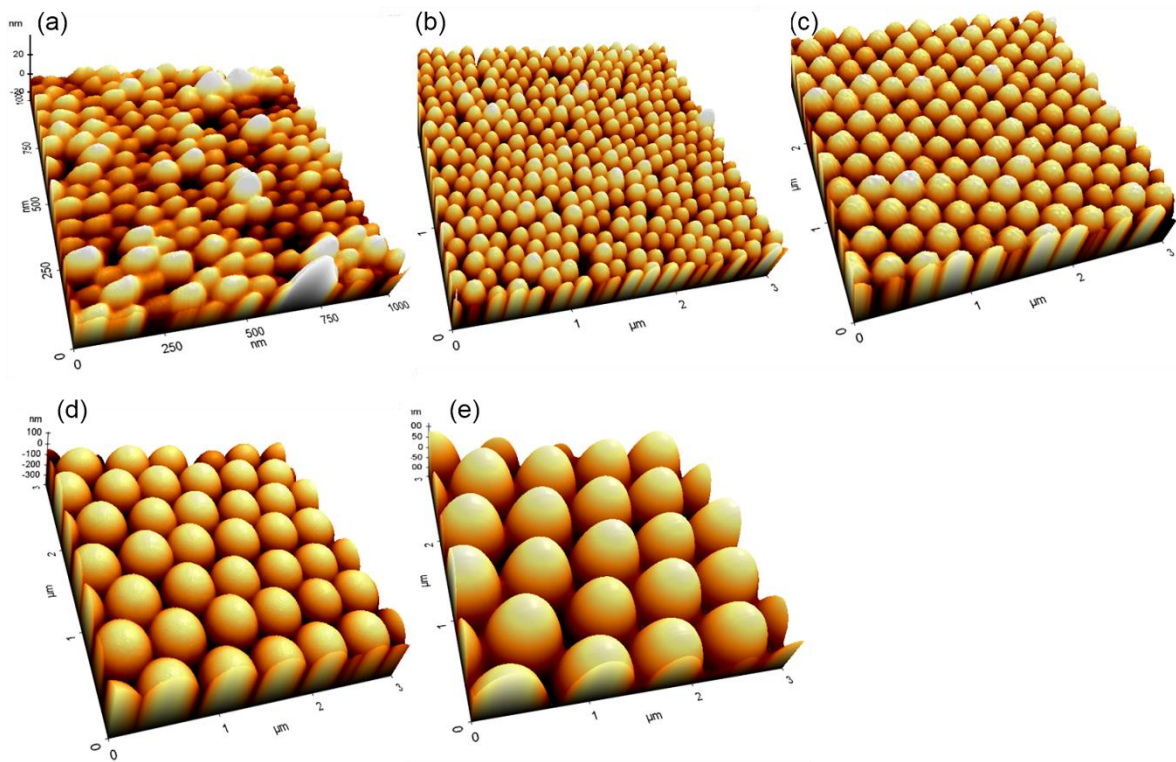

**Figure S1.** AFM images of (a) SN-60, (b) SN-150, (c) SN-300, (d) SN-500, and (e) SN-700. Scale indicated (a) 1  $\mu\text{m}$  and (b-e) 3  $\mu\text{m}$ .

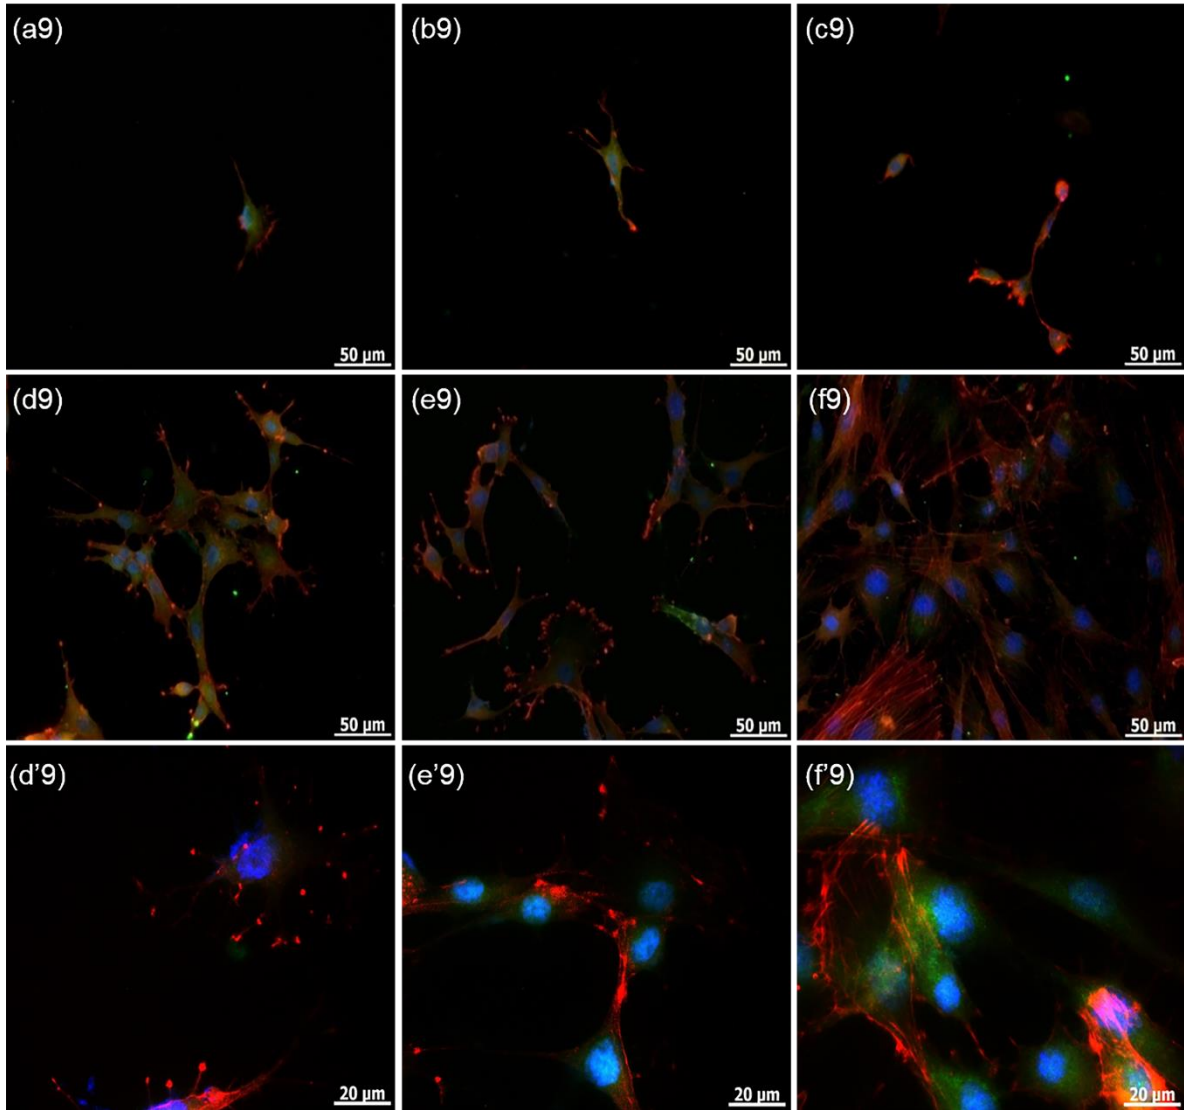

**Figure S2.** Actin-focal adhesion immunostaining in rMDSCs grown on SN at 9 d. (a) SN-60, (b) SN-150, (c) SN-300, (d) SN-500, (e) SN-700, and (f) glass. DAPI (blue), actin (red); FAC (vinculin; green). Magnification,  $\times 400$ ; scale bar = 50  $\mu\text{m}$ . (d'9), (e'9), and (f'9) are enlarged images (magnification,  $\times 1000$ ).

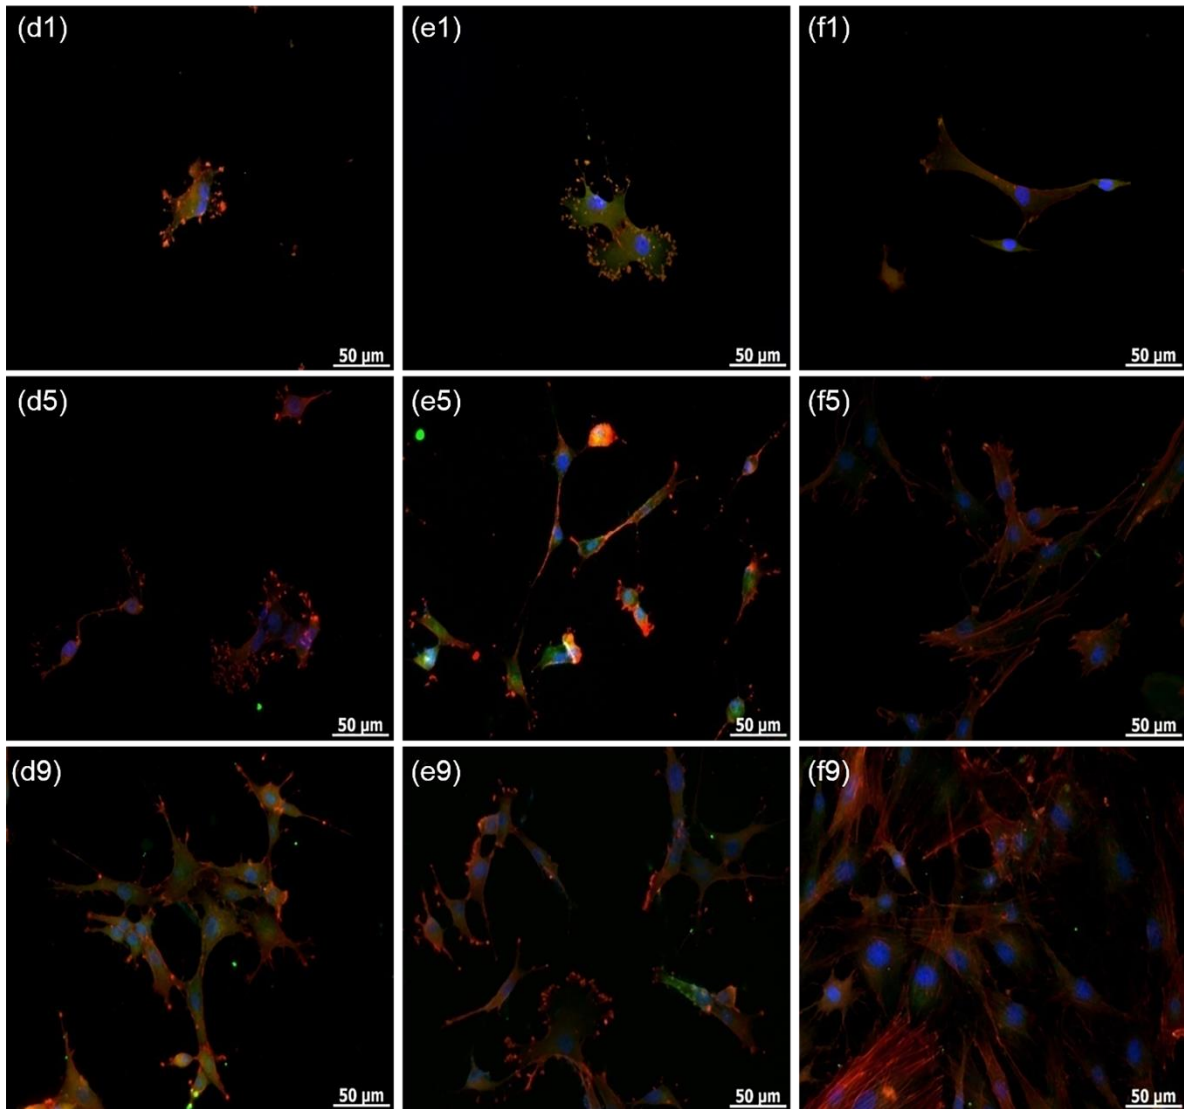

**Figure S3.** Actin-focal adhesion immunostaining in rMDSCs grown on SN for 1, 5, and 9 d. (d) SN-500, (e) SN-700, and (f) glass. The numbers indicate 1, 5, and 9 d. DAPI (blue), actin (red); FAC (vinculin; green). Magnification, x400; scale bar = 50 μm.

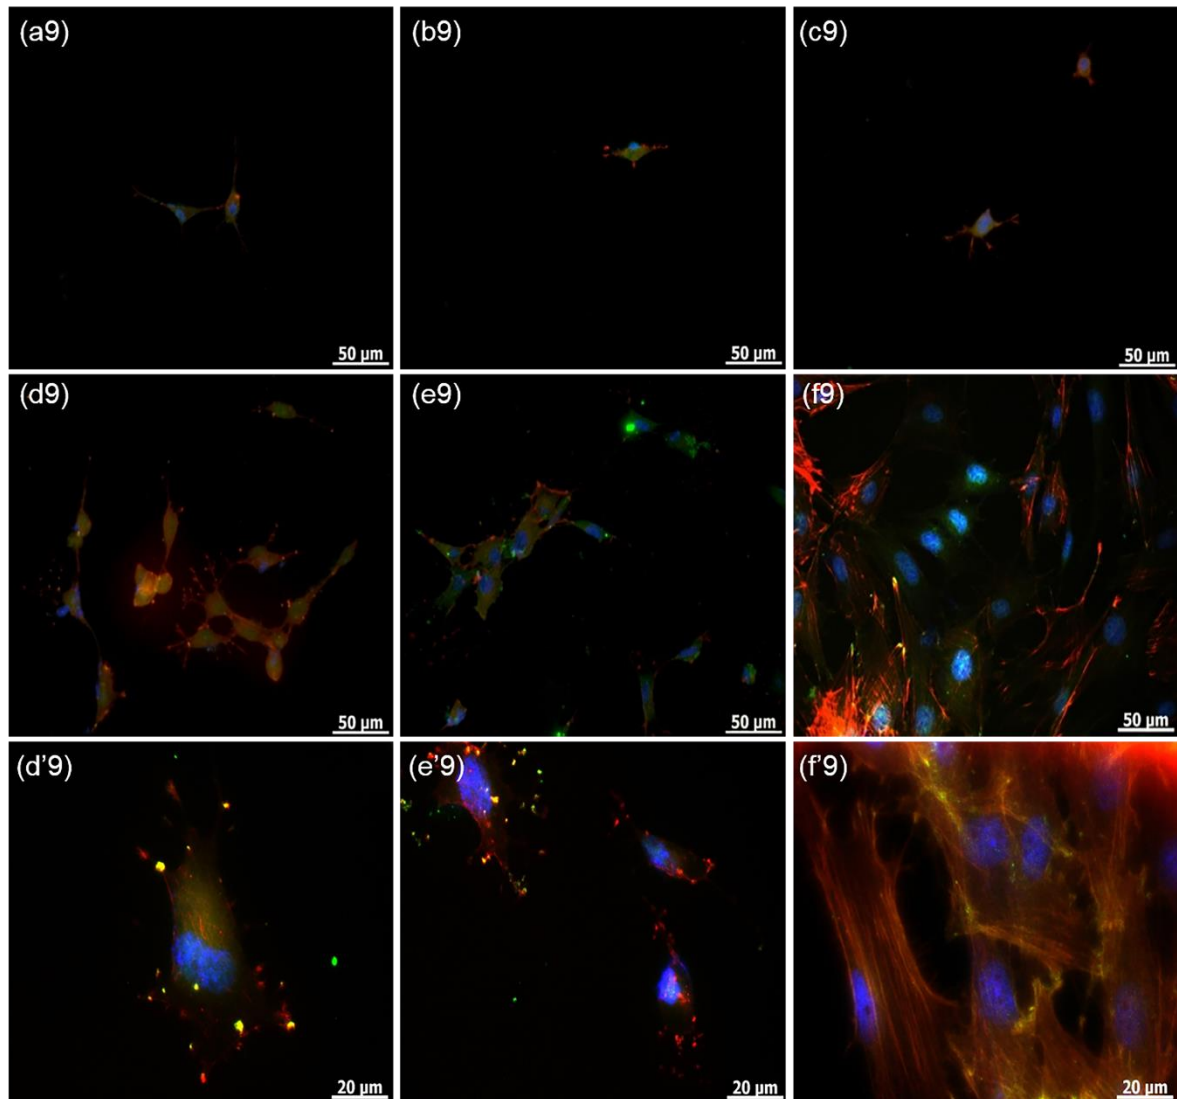

**Figure S4.** Actin-integrin  $\beta 1$  immunostaining in rMDSCs grown on SN at 9 d. (a) SN-60, (b) SN-150, (c) SN-300, (d) SN-500, (e) SN-700, and (f) glass. Blue, DAPI; red, actin; green, integrin  $\beta 1$ . Magnification,  $\times 400$ ; scale bar =  $50 \mu\text{m}$ . (d'9), (e'9), and (f'9) are enlarged images (magnification,  $\times 1000$ ).

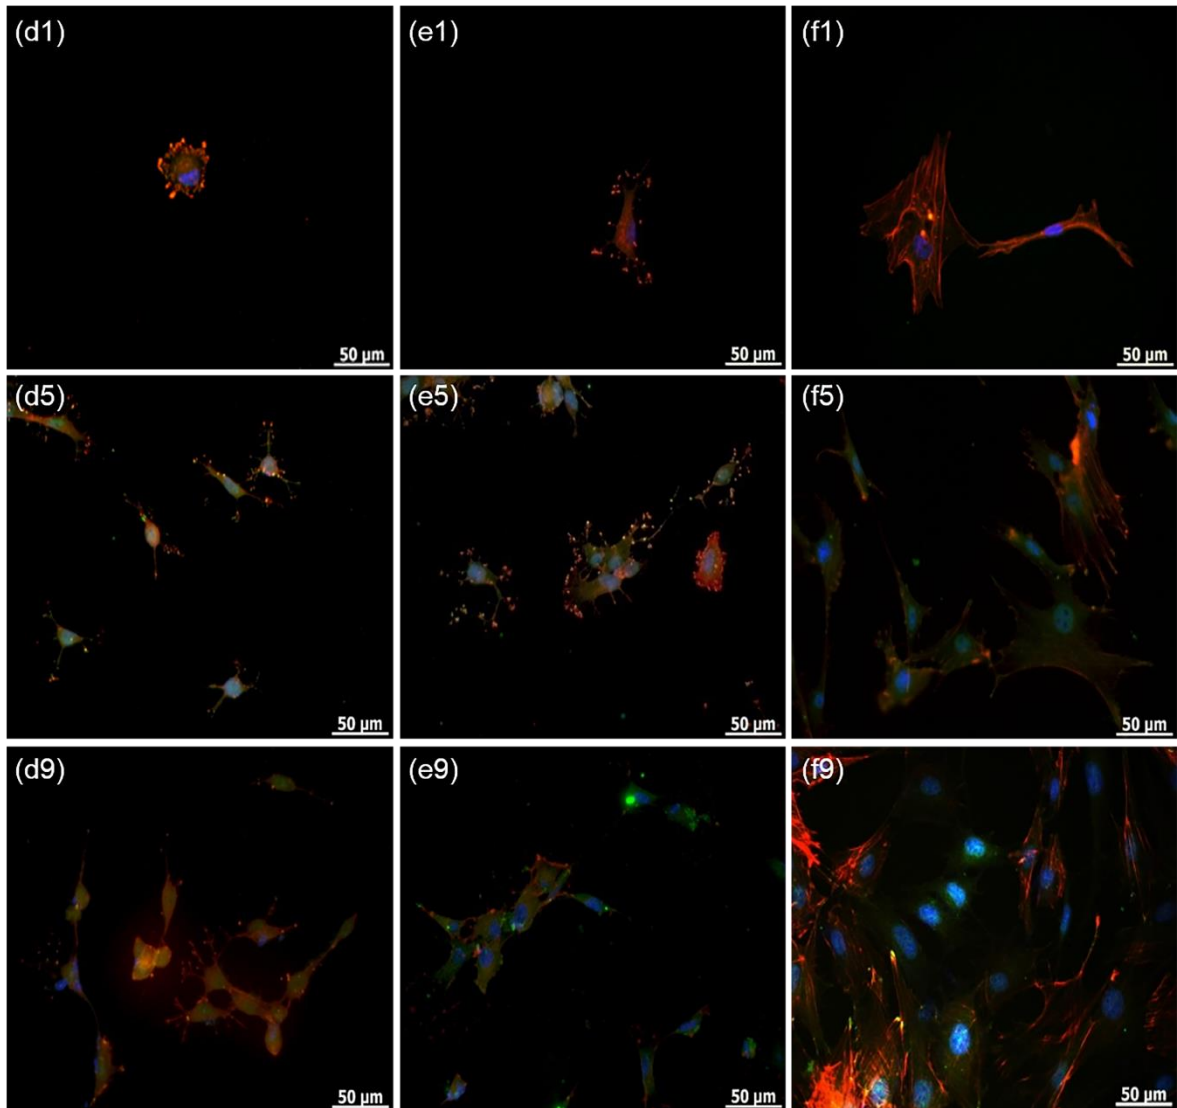

**Figure S5.** Actin-integrin  $\beta 1$  immunostaining in rMDSCs grown on SN for 1, 5, and 9 d. (d) SN-500, (e) SN-700, and (f) glass. The numbers indicate 1, 5, and 9 d. Blue, DAPI; red, actin; green, integrin  $\beta 1$ . Magnification,  $\times 400$ ; scale bar = 50  $\mu\text{m}$ .
